# Supplementary material for: Crosstalk between miR-146a and pro-inflammatory cytokines in patients with systemic lupus erythematosus
Source: PubMed Central journal article supplement — Int J Immunopathol Pharmacol. 2023 Feb 5;37:03946320231154998. doi: 10.1177/03946320231154998 (PMC9903020; doi:10.1177/03946320231154998), 2023-02-05
Supplement: sj-pdf-1-iji-10.1177_03946320231154998.pdf [file sj-pdf-1-iji-10.1177_03946320231154998.pdf]

**Supplementary Table 1.** Laboratory and biochemical features of SLE patients and controls

| Parameter                          | Controls (N= 104)<br>M±SD | Patients (N= 113)<br>M±SD | P value                  |
|------------------------------------|---------------------------|---------------------------|--------------------------|
| Hemoglobin (g/dl)                  | 13.31 ± 1.33              | 11.92 ± 4.68              | <b>P= 0.001, r=-0.20</b> |
| WBC (X1000/ $\mu$ l)               | 8.17 ± 1.29               | 7.89 ± 3.61               | NS                       |
| ESR (mm/hr)                        | 6.19 ± 1.97               | 52.94 ± 32.84             | <b>P= 0.000, r=0.71</b>  |
| Platelets (x1000/ $\mu$ l)         | 290.43 ± 56.90            | 235.25 ± 129.84           | <b>P= 0.000, r=-0.26</b> |
| AST (IU/L)                         | 23.77 ± 5.21              | 23.38 ± 15.18             | NS                       |
| ALT (IU/L)                         | 20.81 ± 5.02              | 21.41 ± 15.74             | NS                       |
| Age years                          | 32.60±9.50                | 27.31±9.70                | NS                       |
| <b>Laboratory parameters</b>       | <b>M±SE</b>               |                           |                          |
| <b>Disease duration (years)</b>    | 7.21±0.53                 |                           |                          |
| Total SLEDAI                       | 9.28 ± 0.73               |                           |                          |
| C3 titer                           | 65.10±6.60                |                           |                          |
| C4 titer                           | 32.98±4.46                |                           |                          |
| <b>Disease activity</b>            |                           |                           |                          |
| No activity                        | 17 (15.1)                 |                           |                          |
| Mild activity                      | 31 (27.4)                 |                           |                          |
| Moderate activity                  | 22 (19.4)                 |                           |                          |
| High activity                      | 26 (23)                   |                           |                          |
| Sever activity                     | 17 (15.1)                 |                           |                          |
| <b>ACR criteria of SLE</b>         | <b>No (%)</b>             |                           |                          |
| <b>Mucocutaneous manifestation</b> | 93 (83%)                  |                           |                          |
| Malar rash                         | 82 (73%)                  |                           |                          |
| Photosensitivity                   | 60 (54%)                  |                           |                          |
| Oral Ulcers                        | 57 (51%)                  |                           |                          |
| Alopecia                           | 34 (30%)                  |                           |                          |
| Serositis                          | 45 (40%)                  |                           |                          |
| Vasculitis                         | 30 (26%)                  |                           |                          |
| Raynauds phenomena                 | 20 (17%)                  |                           |                          |
| Neuropsychiatric disorders         | 14 (12%)                  |                           |                          |
| Pancytopenia                       | 26 (23%)                  |                           |                          |
| Thrombocytopenia                   | 27 (24%)                  |                           |                          |
| Hemolytic anemia                   | 17 (15%)                  |                           |                          |
| Leucopenia                         | 34 (30%)                  |                           |                          |
| Neutropenia                        | 18 (16%)                  |                           |                          |
| Lymphopenia                        | 35 (31%)                  |                           |                          |
| Arthritis                          | 63 (56%)                  |                           |                          |
| Renal disorders                    | 53 (47%)                  |                           |                          |
| Anti-nuclear Ab                    | 113 (100%)                |                           |                          |
| Anti-dsDNA Ab                      | 76 (67%)                  |                           |                          |
| <b>Treatment</b>                   |                           |                           |                          |
| No treatment                       | 2 (0.8%)                  |                           |                          |
| Treatment                          | 98 (98.2%)                |                           |                          |
| Corticosteroid                     | 91 (81%)                  |                           |                          |
| Hydroxychloroquine                 | 95 (84%)                  |                           |                          |
| Cyclophosphamide                   | 54 (48%)                  |                           |                          |
| Azathioprine                       | 71 (63%)                  |                           |                          |
